# Supplementary material
Source: PubMed Central journal article supplement (PMC5255949)
Supplement: ejhg2016149x1.pdf [file ejhg2016149x1.pdf]

**Supplementary Table 1:** Clinical features<sup>a</sup> of patients with *HGSNAT* mutation in comparison to features seen in MPS III (including all types A to D)<sup>a</sup> in general.

|                                                                                  | HPO <sup>a</sup> ID | Phenotypes of MPS III (types A-D) | Female (III:01)     | Male (III:04) |
|----------------------------------------------------------------------------------|---------------------|-----------------------------------|---------------------|---------------|
| Age at last assessment [years of age]                                            |                     |                                   | [32]                | [20]          |
| Mode of inheritance                                                              |                     | AR                                | AR                  | AR            |
| <b>Hair</b>                                                                      |                     |                                   |                     |               |
| Hirsutism                                                                        | 0001007             | +                                 | +                   | -             |
| <b>Bowel and bladder control</b>                                                 |                     |                                   |                     |               |
| Bowel incontinence                                                               | 0002607             | [+]                               | +                   | -             |
| Urinary incontinence [age of onset; years]                                       | 0000020             | [+]                               | +                   | + [10]        |
| <b>Neurologic signs and symptoms</b>                                             |                     |                                   |                     |               |
| Global developmental delay                                                       | 0001263             | +                                 | +                   | +             |
| Intellectual disability, progressive [age of onset; years]                       | 0006887             | + [1-3]                           | +                   | +             |
| Intellectual disability (IQ 70-75 or below)                                      | 0001249             | +                                 | + [9 y]             | -             |
| Intellectual disability, profound (IQ 19 or below)                               | 0002187             | +                                 | + [13 y]            | +             |
| Memory impairment                                                                | 0002354             |                                   | +                   | +             |
| Loss of speech [age of onset; years]                                             | 0002371             | +                                 | + [18]              | + [21]        |
| Brain atrophy [MRI; years of age]                                                | 0012444             | +                                 | + [30]              | + [24]        |
| Facial diplegia [age of onset; years]                                            | 0001349             |                                   | + [9]               | -             |
| Unsteady gait [age of onset; years]                                              | 0002317             | +                                 | + [28]              | -             |
| Babinski sign [years of age]                                                     | 0003487             | +                                 | + [30]              | -             |
| Seizures [age of onset; years]                                                   | 0001250             | +                                 | + [30]              | -             |
| Epileptiform EEG discharges [years of age]                                       | 0011182             | +                                 | -                   | + [11]        |
| Hearing impairment                                                               | 0000365             | +                                 | -                   | +             |
| Abnormal auditory evoked potentials                                              | 0006958             |                                   | n.d.                | +             |
| Pain insensitivity [years of age]                                                | 0007021             |                                   | + [27]              | -             |
| Poor motor coordination                                                          | 0002275             | +                                 | +                   | +             |
| Abnormality of somatosensory evoked potentials                                   | 0007377             |                                   | +                   | n.d.          |
| Abnormality of visually evoked potentials                                        | 0000649             | [+]                               | n.d.                | +             |
| Abnormal mitochondria in muscle tissue [years of age]                            | 0008316             |                                   | n.d.                | + [11]        |
| <b>Behavioral and psychiatric symptoms</b>                                       |                     |                                   |                     |               |
| Apathy                                                                           | 0000741             | +                                 | n.d.                | +             |
| Emotional lability                                                               | 0000712             |                                   | +                   | +             |
| Restlessness [age of onset; years]                                               | 0000711             | + [5-10]                          | + [4]               | +             |
| Disinhibition                                                                    | 0000734             |                                   | +                   | +             |
| Aggressive behavior                                                              | 0000718             | +                                 | +                   | +             |
| Temper tantrums                                                                  | -                   | +                                 | +                   | +             |
| Loss of independence for self-care [age of onset; years]                         | -                   |                                   | + [32]              | +             |
| Inability to recognize the emotional significance of objects (psychic blindness) | -                   |                                   | +                   | +             |
| Inappropriate sexual behavior [years of age]                                     | 0008768             |                                   | + [13] <sup>b</sup> | -             |
| Placidity/tameness                                                               | -                   | [+]                               | +                   | +             |
| Polyphagia                                                                       | 0002591             |                                   | +                   | +             |
| Hyperorality and the ingestion of inappropriate objects                          | -                   |                                   | +                   | +             |
| Excessive tendency to attend and react to visual stimulus (hypermetamorphosis)   | -                   |                                   | +                   | +             |
| Behavioral abnormality [age of onset; years]                                     | 0000708             | + [1-6]                           | + [<9]              | +             |
| Stereotypic behavior                                                             | 0000733             | +                                 | +                   | +             |
| Impaired social interactions                                                     | 0000735             | +                                 | +                   | +             |
| Sleep disturbance [age of onset; years]                                          | 0002360             | +                                 | + [<9]              | + [11]        |

<sup>a</sup>All symptoms were listed according to the nomenclature/systematics of the OMIM "Clinical synopsis" and the Human Phenotype Ontology <sup>1</sup>. Phenotype of MPS III has been listed according to <sup>2-6</sup>; <sup>b</sup> Not observed from the age of 28 years onward. Abbreviations: **AR**, autosomal recessive; **EEG**, electroencephalogram; **HPO**, Human Phenotype Ontology; **MPS**, mucopolysaccharidosis; **MRI**, magnetic resonance imaging; **n.d.**, not determined

## SUPPLEMENTARY REFERENCES

- 1 Robinson PN, Köhler S, Bauer S, Seelow D, Horn D, Mundlos S. The Human Phenotype Ontology: a tool for annotating and analyzing human hereditary disease. *Am J Hum Genet* 2008; **83**: 610–615.
- 2 Husain AM, Escolar ML, Kurtzberg J. Neurophysiologic assessment of mucopolysaccharidosis III. *Clin Neurophysiol Off J Int Fed Clin Neurophysiol* 2006; **117**: 2059–2063.
- 3 Ruijter GJG, Valstar MJ, van de Kamp JM, van der Helm RM, Durand S, van Diggelen OP *et al.* Clinical and genetic spectrum of Sanfilippo type C (MPS IIIC) disease in The Netherlands. *Mol Genet Metab* 2008; **93**: 104–111.
- 4 Siciliano L, Fiumara A, Pavone L, Freeman C, Robertson D, Morris CP *et al.* Sanfilippo syndrome type D in two adolescent sisters. *J Med Genet* 1991; **28**: 402–405.
- 5 Valstar MJ, Ruijter GJG, van Diggelen OP, Poorthuis BJ, Wijburg FA. Sanfilippo syndrome: a mini-review. *J Inherit Metab Dis* 2008; **31**: 240–252.
- 6 van Schrojenstein-de Valk HM, van de Kamp JJ. Follow-up on seven adult patients with mild Sanfilippo B-disease. *Am J Med Genet* 1987; **28**: 125–129.
