# Supplementary material
Source: PubMed Central journal article supplement (PMC5255949)
Supplement: ejhg2016149x2.pdf [file ejhg2016149x2.pdf]

| GENE                  | GENE NAME                                                  | OMIM    | MOI | OMIM DISEASE NAME                                            | REASON FOR IN/EXCLUDING THE VARIANT AS PATHOGENIC                                                                                                                                                                                                                                                     | ENSEMBL TRANSCRIPT | CHR | POS [HG19]  | VARIANT [RefSeq Number]    | AAE       | COVERAGE [fold] | VARIANT FREQUENCY [%] | dbSNP       | MAJOR ALLELE HOMO * | HET * | MINOR ALLELE HOMO * | ExAC SERVER: VARIANTS PER ALLELES (TOTAL) |             |
|-----------------------|------------------------------------------------------------|---------|-----|--------------------------------------------------------------|-------------------------------------------------------------------------------------------------------------------------------------------------------------------------------------------------------------------------------------------------------------------------------------------------------|--------------------|-----|-------------|----------------------------|-----------|-----------------|-----------------------|-------------|---------------------|-------|---------------------|-------------------------------------------|-------------|
| <b>Patient III:04</b> |                                                            |         |     |                                                              |                                                                                                                                                                                                                                                                                                       |                    |     |             |                            |           |                 |                       |             |                     |       |                     |                                           |             |
| <b>HGSNAT</b>         | Heparan- $\alpha$ -glucosaminide N-acetyltransferase       | #252930 | AR  | Mucopolysaccharidosis type IIIC, Sanfilippo syndrome type C  | <b>confirmed:</b> missense mutation of a conserved amino acid, biochemical proof of an Acetyl-CoA: $\alpha$ -glucosaminide N-acetyltransferase deficiency                                                                                                                                             | ENST00000458501    | 8   | 43,016,605  | c.518G>A [NM_152419]       | p.(G173D) | 68              | 100                   | rs370717845 | 2494                | 0     | 0                   | 119,776 / 0                               |             |
|                       |                                                            |         |     |                                                              | <b>excluded:</b> NO splice defect found on the cDNA level.                                                                                                                                                                                                                                            | ENST00000458501    | 8   | 43,046,607  | c.1770-10C>A [NM_152419]   |           | 123             | 100                   |             |                     |       |                     |                                           |             |
| <b>CYP7A1</b>         | cytochrome P450, family 7, subfamily A, polypeptide 1      |         |     |                                                              | <b>excluded:</b> 393 heterozygous and 1 homozygous variants in ExAC                                                                                                                                                                                                                                   | ENST00000301645    | 8   | 59,404,935  | c.1192G>C [NM_000780]      | p.(P398A) | 73              | 100                   | rs142708991 | 2497                | 7     | 0                   | 121,410 / 394                             |             |
| <b>MYBL1</b>          | V-myb myeloblastosis viral oncogene homolog (avian)-like 1 |         |     |                                                              | <b>excluded:</b> predicted splice site change at position +3 of splice acceptor, but <b>NO</b> splicing defect on cDNA detected, <b>NO</b> abnormality of the hematopoietic system                                                                                                                    | ENST00000522677    | 8   | 67,479,108  | c.2543+3T>C [NM_001080416] |           | 133             | 100                   |             |                     |       |                     |                                           | 120,080 / 6 |
| <b>JPH1</b>           | Junctophilin 1                                             | #607706 | AR  | Charcot-Marie-Tooth disease, axonal, with vocal cord paresis | <b>excluded:</b> phenotype does not fit to predescribed disease in OMIM, exon only present in rare transcript. <b>NO</b> vocal cord paresis, amyotrophy, neuropathy, vocal cord paresis, hand abnormalities                                                                                           | ENST00000342232    | 8   | 75,233,509  | c.14T>C [NM_020647]        | p.(R5K)   | 12              | 100                   |             |                     |       |                     | 47,352 / 0                                |             |
| <b>COL14A1</b>        | Collagen, type XIV, alpha 1                                | 614936  | AR  | Punctate palmoplantar keratoderma type 1                     | <b>excluded:</b> 625 heterozygous and 4 homozygous variants in ExAC, phenotype does not fit to predescribed disease in OMIM: <b>no</b> skin abnormalities (elasticity, punctate palmoplantar keratoderma), does not correspond to mouse phenotype (decreased body weight, impaired glucose tolerance) | ENST00000309791    | 8   | 121,267,490 | c.2764G>A [NM_021110]      | p.(V922I) | 117             | 100                   | rs11774228  | 2491                | 12    | 1                   | 121,378 / 629                             |             |

**Supplementary Table 2: Homozygous variants in the autozygous region that cause an amino acid exchange and were predicted to be disease causing by the MutationTaster or MERAP software.** MOI, mode of inheritance; AR, autosomal recessive; AD, autosomal dominant; AAE, amino acid exchange, \* Frequencies refer to the genotypes of the 1000 Genome Project; ExAC, Exome Aggregation Consortium (<http://exac.broadinstitute.org/>); Mouse phenotype data were obtained from the mouse phenotype database: <http://www.mousephenotype.org/data/search/gene>
