# Supplementary material
Source: PubMed Central journal article supplement (PMC5255949)
Supplement: ejhg2016149x3.pdf [file ejhg2016149x3.pdf]

**Supplementary table 3:** Oligonucleotides used for PCR and Sanger sequencing of the *HGSNAT* coding region.

| <i>HGSNAT</i><br>Exon | Forward oligonucleotide<br>[5'-3'] | Reverse oligonucleotide<br>[5'-3'] | PCR<br>product<br>size [bp] |
|-----------------------|------------------------------------|------------------------------------|-----------------------------|
| <i>Exon 01</i>        | CTTCTTTCCTGGCCAGCTC                | GAAGTCGCAGCAACAGCC                 | 482                         |
| <i>Exon 02</i>        | GGAAGCAACTGTTACACGA                | AGGGCTTTAGACATGAGAGCA              | 289                         |
| <i>Exon 03</i>        | TGGATATTTATGTCCTCCAGCA             | CTGGGTACGGACCAGAAAAG               | 331                         |
| <i>Exon 04</i>        | GGTCCGTACCCAGGAACAT                | CGTCATGGACTGCTTTGCT                | 320                         |
| <i>Exon 05</i>        | CTTCCCCTCACTGGTTTTCA               | AATATGGCCACTTGAGGGTG               | 266                         |
| <i>Exon 06</i>        | GAGCTGCTGAAAATTGTGATTC             | CAACCTGGCCTTCCTCAATA               | 357                         |
| <i>Exon 07</i>        | TGAGCCAAGGTCTTGCCATT               | GTCCTGTGACTACCTGCACC               | 319                         |
| <i>Exon 08</i>        | TTGTTGCATGATTGCACCTT               | TGGAGTTTCTGGGGAGAATG               | 273                         |
| <i>Exon 09</i>        | CCTCCCCTGGGTTTACTTTC               | CGTCTCAGAAGAGAGGCTCC               | 228                         |
| <i>Exon 10</i>        | ATGGTTGCTTCTCTTTATAGCA             | GGCACCTGAGATGGAGGAAT               | 355                         |
| <i>Exon 11</i>        | TGTCTTCCCCTTTAGGAAACAA             | GGGACCAGTCTGGACAACAT               | 302                         |
| <i>Exon 12</i>        | CCAAAAAGGCCAAGAAATGA               | AGACCTGTGAAAGCCCAGAA               | 307                         |
| <i>Exon 13</i>        | GTTGGGATTACAGGCGTGAG               | ATGGTTTAACGTTTGCTGGC               | 325                         |
| <i>Exon 14</i>        | TGTATTTGGTCTAGGAGCTGTTG            | GGCCCATAGCACAAGAGAGA               | 280                         |
| <i>Exon 15</i>        | TGCCAGCAAGTGAATCTC                 | TGGCTAGCTCAGTGTTGCTAA              | 277                         |
| <i>Exon 16+17</i>     | GCACAAGTTTCAGCCCTCTC               | ACCAAGGATGCTCCAGAGGT               | 475                         |
| <i>Exon 18</i>        | AGTAGCCAACAATGGAAGTGC              | TCACAAATAGACAGGCAGAGTTC            | 500                         |
